1 **Impaired social contacts with familiar anesthetized conspecific in CA3-restricted BDNF**  
2 **knockout mice**

3

4

5

6

7

8 Wataru Ito<sup>1</sup>, Howard Huang<sup>1</sup>, Vanessa Brayman<sup>1</sup> and Alexei Morozov<sup>1,2,3</sup>

9

10 Virginia Tech Carilion Research Institute, Roanoke, Virginia, USA; <sup>2</sup>School of Biomedical  
11 Engineering and Sciences, Virginia Tech, Blacksburg, Virginia, USA; <sup>3</sup>Department of Psychiatry  
12 and Behavioral Medicine, Virginia Tech Carilion School of Medicine, Roanoke, Virginia, USA.

13

14

15

16 Correspondence: Alexei Morozov, 2 Riverside Circle, Roanoke, VA 24016, phone: 540-526-  
17 2021; FAX: 540-985-3373, e-mail: alexeim@vtc.vt.edu.

18

19

20

21

22

23

24 **Abstract**

25 Familiarity is the vital characteristic conveyed by social cues to determine behaviors towards  
26 conspecific. Here we characterize social contacts to familiar vs unfamiliar male conspecific,  
27 anesthetized to eliminate inter-male aggression. During initial 10 min (phase-1), subjects  
28 contacted demonstrators vigorously regardless of familiarity. During subsequent 80 min (phase-  
29 2), however, they contacted more with familiar than unfamiliar conspecifics. Then, this test was  
30 applied on highly aggressive mice with hippocampal CA3-restricted BDNF knockout (KO), in  
31 which aggression may mask other behaviors. KO showed less preference to contacting familiar  
32 conspecific than wild type (WT) during phase-2 but no differences during phase-1. Among non-  
33 social behaviors, eating duration was shorter in the presence of familiar than unfamiliar  
34 conspecific in WT, but same in KO. Additionally, KO exhibited reduced pain sensitization.  
35 Altogether, these findings suggest that KO has deficits in circuits that process social cues from  
36 familiar conspecifics and pain and, possibly, underlie empathy-like behaviors.

37

## 38 **Introduction**

39 When conspecifics encounter each other, the social cues that inform about familiarity are likely  
40 to trigger adaptive behaviors, which are crucial for their survival. To investigate brain circuits  
41 that process social cues, a behavioral paradigm is necessary that is sensitive enough to compare  
42 social interactions between familiar and unfamiliar conspecifics without a disruption by  
43 competing behaviors. Several tests have been established in rodents for measuring distinct social  
44 traits, including sociability (Moy et al., 2004), social memory (Ferguson et al., 2000), social  
45 transmission of food preference (Galef and Wigmore, 1983), aggression (Winslow and Miczek,  
46 1983), dominance (Sa-Rocha et al., 2006) and empathy-like behaviors (Ben-Ami Bartal et al.,  
47 2011; Chen et al., 2009; Langford et al., 2006; Panksepp and Lahvis, 2011). Since in these tests,  
48 the subjects encounter active conspecifics, the behaviors are the function of reciprocal  
49 interactions, during which the subject and demonstrator influence one another. This bi-  
50 directionality increases the variability of behavioral readout and possibly masks certain  
51 behavioral traits. As an extreme case, the high inter-male aggression in rodents overshadows  
52 other forms of social interactions between unfamiliar males.

53 To overcome such limitations, we characterize the interaction with an anesthetized  
54 conspecific that eliminated both the reciprocal exchange of social cues and inter-male aggression.  
55 The anesthetized demonstrator remains a source of strong social signals, which have been found  
56 to elicit defensive responses including ultrasound vocalizations in rats (Blanchard et al., 1986;  
57 Blanchard et al., 1993).

58 In this study, we examine mice with the CA3-restricted knockout of BDNF, which  
59 exhibit elevated aggression and dominance towards cage mates but normal cognition and social  
60 memory (Ito et al., 2011). As predicted, the new test allowed comparisons between responses to

61 social cues from familiar versus unfamiliar conspecific while avoiding aggression. To this end,  
62 we find a distinct social trait - sustained contacting the familiar, but not unfamiliar anesthetized  
63 conspecific - and that trait was compromised in the BDNF KO mice, which showed normal  
64 sociability in the three chamber test (Moy et al., 2004).

65

66

## 67 **Results**

### 68 **Effect of BDNF CA3 KO on contacting familiar and unfamiliar demonstrator**

69 The KO and WT mice were presented with an anesthetized demonstrator, either the sibling cage  
70 mate (familiar) or a stranger on the 129SvEv background (unfamiliar) (Fig.1A). The  
71 demonstrator was placed at the center of the cage and the cotton nest was at the corner. Subjects  
72 did not exhibit aggression, neither did they huddle; however, in the case of familiar  
73 demonstrators, they started huddling once the anesthesia wore off and demonstrator began to  
74 move, typically, after 90 min of immobility. We first analyzed physical contacts towards the  
75 anesthetized demonstrator. The "contacting" included sniffing head and genitals, allogrooming,  
76 head-to-head contact, touching any body part, sticking a nose under the body, and digging wood  
77 chip bedding underneath.

78 Total four independent groups of the KO and WT mice presented with either familiar or  
79 unfamiliar demonstrators were examined (Fig.1). In all groups, robust contacts were observed  
80 during the first 10 minutes followed by the lower level but steady contacts during the remaining  
81 80 min (Fig.1B). For the intense contacts during the first 10 min, there was no significant  
82 genotype\*familiarity interaction or no significant main effect of either familiarity or genotype.  
83 During the subsequent 80 minutes, there was a significant genotype\*familiarity interaction

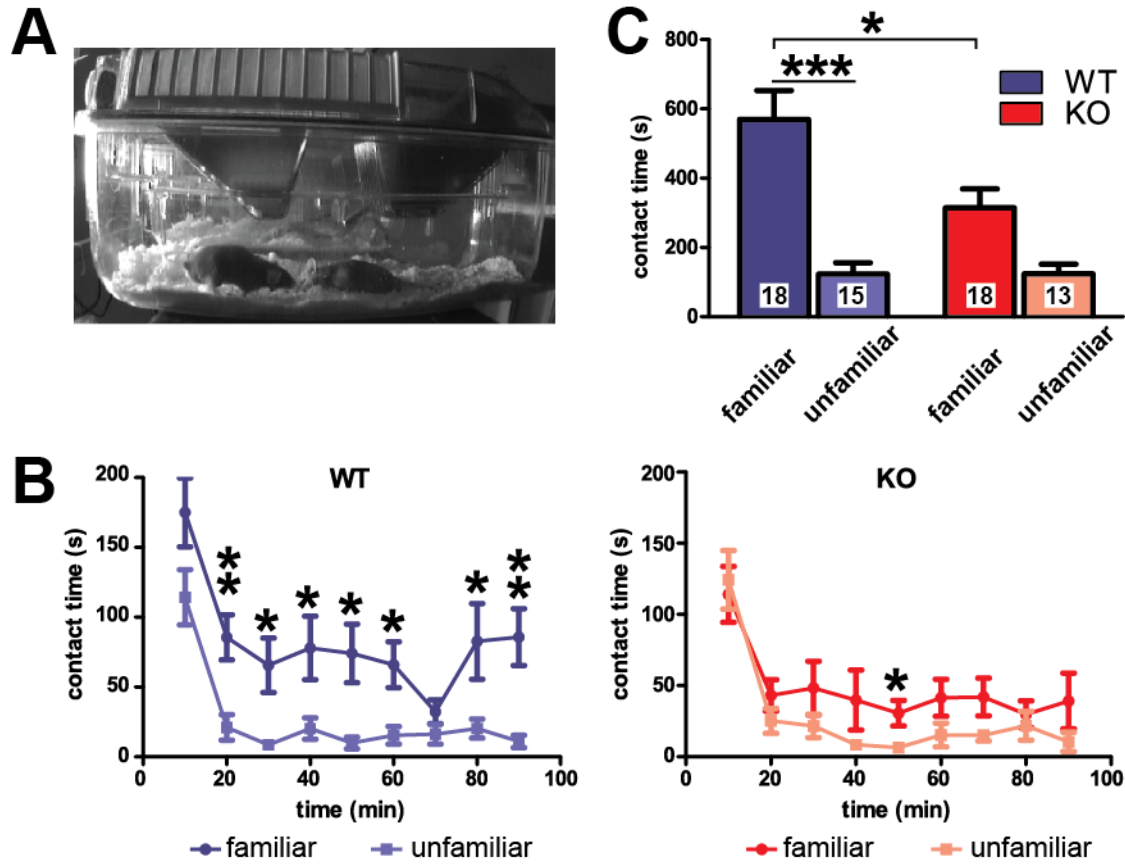

84

85 Fig.1 A decreased preference to interact with familiar anesthetized conspecific in BDNF KO  
 86 mice. A) The interaction with anesthetized conspecific paradigm. A snapshot of a typical contact  
 87 of a subject (left) with an anesthetized familiar conspecific (right). An infrared LED lamp  
 88 illuminates the cage from the left side. B) Time courses for the duration of contacts made by WT  
 89 (left, blue) and KO (right, red) subjects, shown in 10 min bins. The plots of darker and lighter  
 90 colors correspond to the familiar and unfamiliar demonstrator, respectively. C) Summary bar  
 91 diagram for the total durations of contacts with familiar and unfamiliar conspecifics by WT  
 92 (blue) and KO (red) subjects. Numbers of animals are shown on the bars. Unpaired two-tailed t-  
 93 test in B, Bonferroni post-hoc analyses in C: \* $p < 0.05$ , \*\* $p < 0.01$ , \*\*\* $p < 0.001$ . Error bars  
 94 represent s.e.m.

95

96  
97 (F(1,60)=4.59, p=0.036) alongside a significant main effects of both familiarity (F(1,60)=28.6,  
98 p<0.001) and genotype (F(1,60)=4.58, p=0.038). In the time bin analysis along the 90 min  
99 observation period, WT mice exhibited a significantly longer duration of contacts with familiar  
100 mice during seven out of nine 10-min time bins, whereas KO mice showed a significant  
101 difference only in one bin (Fig.1B). There were no differences between genotypes in contacting  
102 unfamiliar mice. For the entire 90 min, WT mice spent significantly more time contacting  
103 familiar stimuli (t=5.38, p<0.001), whereas KO mice only showed a tendency to do so (t=2.2,  
104 p>0.05) (Fig.1C). Together, these data indicate that when compared to the WT controls, the KO  
105 mice have a reduced preference to contacting familiar over unfamiliar anesthetized mice in the  
106 home cage.

107

### 108 **Effect of BDNF CA3 KO on non-social behaviors in the presence of familiar and unfamiliar** 109 **demonstrator**

110 Since the differences between WT and KO in contacting familiar demonstrators may reflect  
111 changes in non-social behaviors that compete with the contacting activity, we quantified the non-  
112 social behaviors at the time-resolution of a single video frame. The behaviors included eating  
113 from food hopper and drinking from water sipper (Eating), hanging from metal wire lid  
114 (Hanging), sitting still or sleeping alone in cotton nest (Resting in Nest), digging wood bedding  
115 (Digging), self-grooming (Grooming), rearing (Rearing), sitting still outside of the cotton nest  
116 (Not Moving).

117 First, before the detailed ethology, we analyzed locomotion of the subjects during the test.  
118 For the total distance traveled, the two-way ANOVA did not detect a significant

119 genotype\*familiarity interaction or a significant main effect of familiarity or genotype. For the  
120 average distance to the demonstrator, the ANOVA detected a significant main effect of  
121 familiarity ( $F(1,60)=8.06$ ,  $p=0.006$ ) and the Bonferroni posttest revealed a significantly longer  
122 average distance to the unfamiliar demonstrator in the WT group ( $t=2.48$ ,  $p<0.05$ ) (Fig.2A-C).  
123 There were no significant effects on the durations of Digging, Grooming, Rearing, and Not  
124 Moving (Fig.2D lower row panels) but in the presence of unfamiliar demonstrator, there were  
125 opposing tendencies in WT and KO mice towards more and less Digging, respectively, and a  
126 tendency towards more Not Moving in both genotypes.

127 By contrast, for Eating, there was a significant genotype\*familiarity interaction  
128 ( $F(1,60)=4.2$ ,  $p=0.044$ ). The Bonferroni post-hoc analyses revealed that the WT mice spent  
129 significantly less time eating in the presence of familiar than unfamiliar demonstrator ( $t=2.97$ ,  
130  $p<0.01$ ), whereas the KO mice did not ( $t=0.003$ ,  $p>0.05$ ). However, there was no significant  
131 negative correlation between Eating and contacting demonstrator ( $r=-0.043$ ,  $p=0.73$ ), which  
132 indicated that these two behaviors did not compete. For Hanging, there was no significant  
133 interaction between the two factors but a significant main effect of familiarity ( $F(1,60)=14.2$ ,  
134  $p<0.001$ ). Post-hoc analyses revealed that the KO mice spent significantly more time hanging in  
135 the presence of unfamiliar demonstrator ( $t=3.7$ ,  $p<0.001$ ), whereas the differences in WT mice  
136 were not significant ( $t=1.6$ ,  $p>0.05$ ). For Resting in Nest, there was a significant main effect of  
137 genotype ( $F(1,60)=6.3$ ,  $p=0.015$ ) but no genotype\*familiarity interaction. Together, these data  
138 indicate that the genotype of subjects and the familiarity of anesthetized demonstrator influence  
139 several non-social behaviors without altering the overall activity of the subject.

140

141

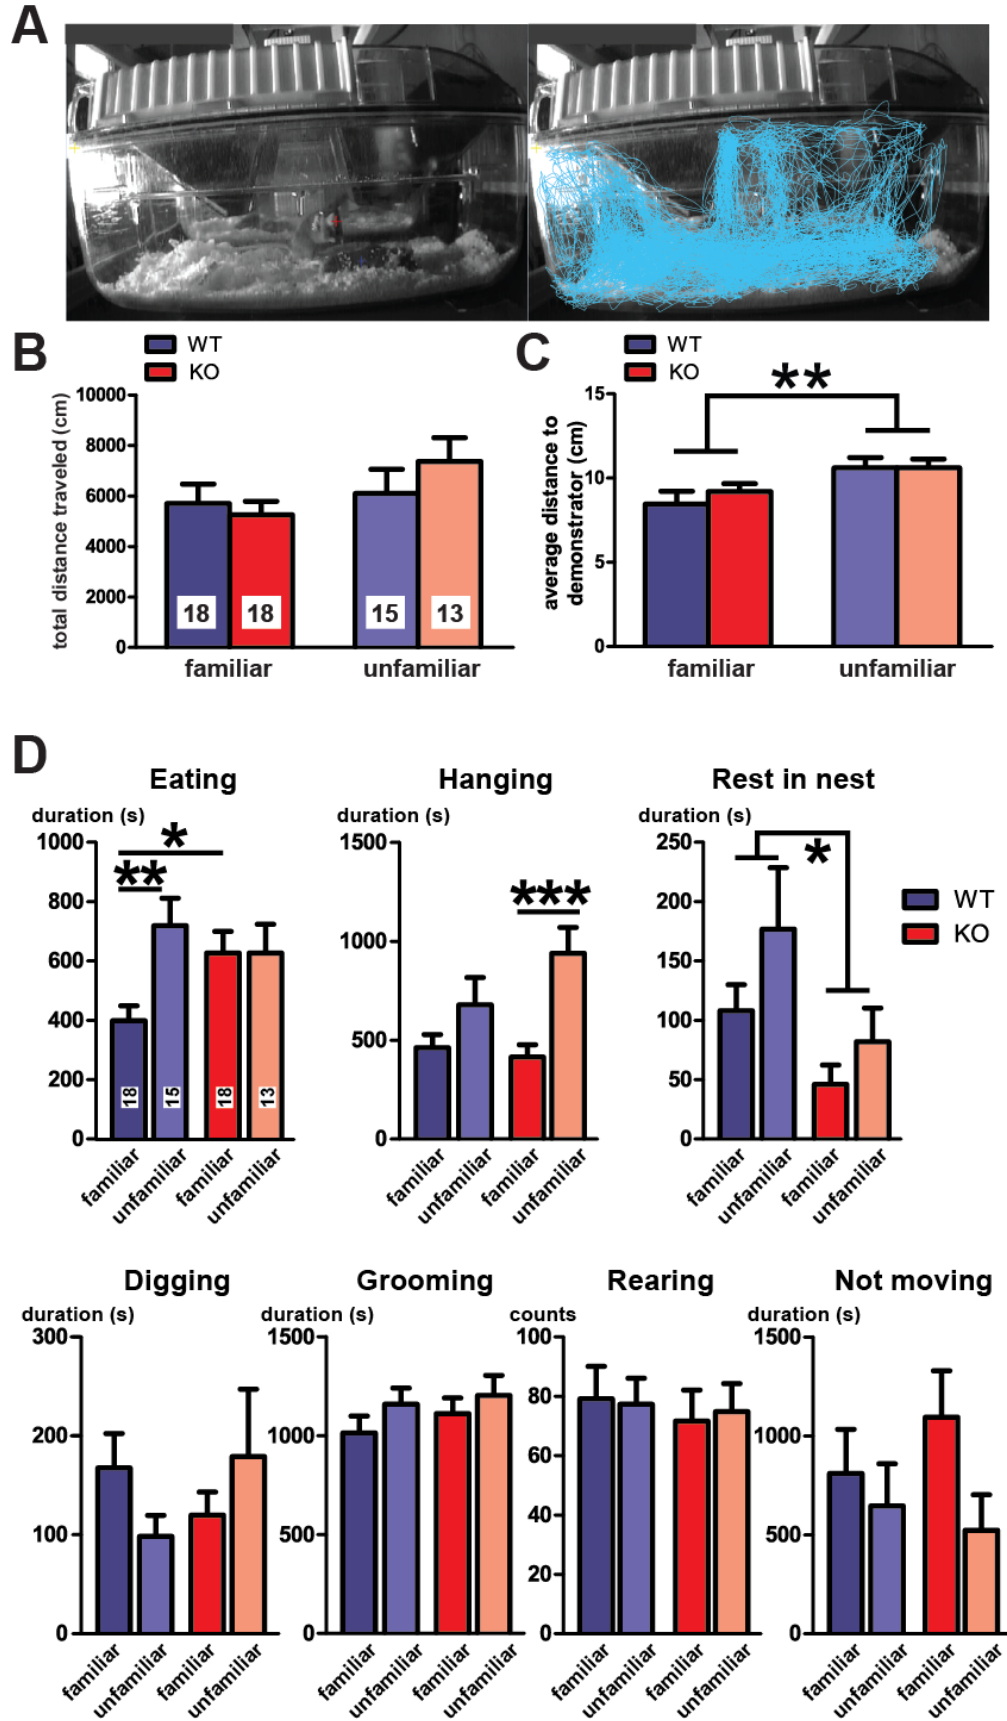



143 Fig.2 Non-social behaviors during the interaction with anesthetized conspecific. A-C) Genotype  
144 of subject and familiarity of demonstrator do not affect locomotion. A) Example pictures without  
145 (left) and with the overlay of moving trajectory (right) during the 90 min session with an  
146 anesthetized conspecific. B-C) Summary diagrams for total distance traveled and average  
147 distance to the demonstrator. D) Summary diagrams for the duration of other non-social  
148 behaviors. Blue and red colors represent WT and KO subjects, respectively. Cage mates (familiar,  
149 represented by darker colors) and 129 background mice (unfamiliar, represented by lighter  
150 colors) were used as the anesthetized demonstrators. Numbers of animals are shown on the bars.  
151 ANOVA, main effect of demonstrator in C and Bonferroni post-hoc analyses in D: \* $p < 0.05$ ,  
152 \*\* $p < 0.01$ , \*\*\* $p < 0.001$ . Error bars represent s.e.m.

153

#### 154 **Normal sociability of BDNF CA3 KO mice**

155 Sociability, or a propensity to spend time with another awake animal (Moy et al., 2004), was  
156 examined as a trait that could relate to the decreased contacting of KO mice with the anesthetized  
157 demonstrator. The three-chamber sociability task (Moy et al., 2004) was conducted on two  
158 groups per each genotype using either familiar (cage mates) or unfamiliar (age-matched  
159 129SvEv background male mice) awake demonstrator in the cup. With either type of  
160 demonstrator, the subjects spent more time near the cup containing demonstrator vs an empty  
161 cup (unfamiliar:  $F(1,33)=7.8$ ,  $p=0.009$ ; familiar:  $F(1,26)=24.6$ ,  $p<0.0001$ ) but there was no  
162 significant cup\*genotype interaction (unfamiliar:  $F(1,33)=0.25$ ;  $p=0.62$ ; familiar:  $F(1,26)=0.005$ ,  
163  $p=0.94$ ) (Fig.3). In both genotypes, the post-hoc analyses revealed significant preference towards  
164 spending more time with familiar demonstrator than with empty cup (WT:  $t=3.7$ ,  $p<0.01$ ; KO:  
165  $t=3.3$ ,  $p<0.01$ ), whereas, with unfamiliar demonstrator, the preference did not reach significance

166 (WT:  $t=1.7$ ,  $p=0.07$ ; KO:  $t=2.2$ ,  $p=0.06$ ). In addition, the two-way ANOVA did not detect a  
167 significant stimulus (familiar vs unfamiliar)\*cup (containing demonstrator vs empty) interaction.  
168 Together, these data indicate that KO and WT mice have the same level of sociability.  
169

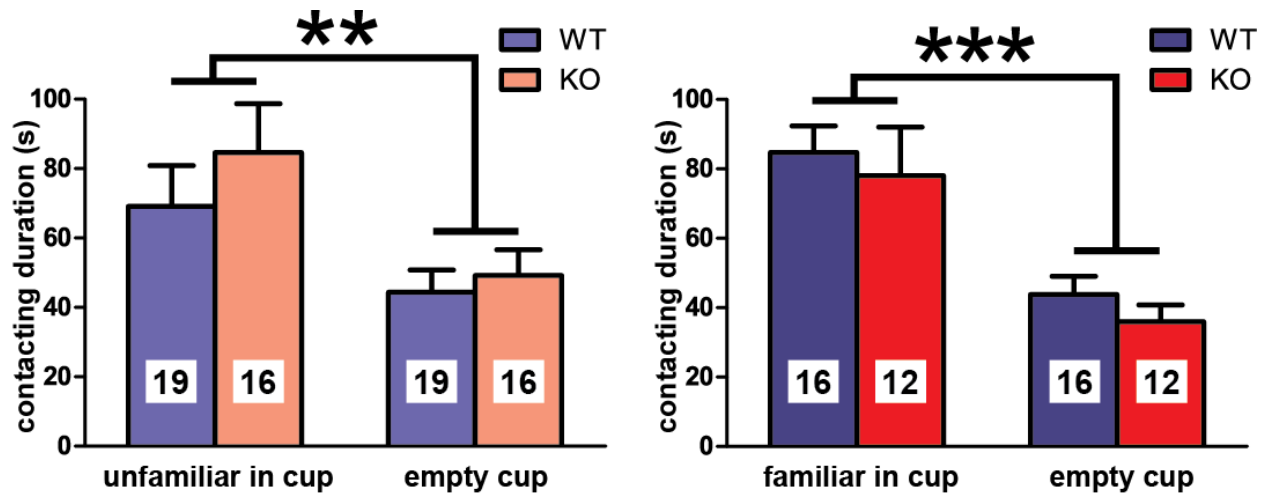

170  
171 Fig.3 Normal sociability in KO mice. Summary diagrams for contact durations with empty cup  
172 or cup with a demonstrator, either unfamiliar (left) or familiar (right). Blue and red colors  
173 represent WT and KO subjects and the number in each bar indicates the number of subjects.  
174 ANOVA, main effect of cup: \*\* $p < 0.01$ , \*\*\* $p < 0.001$ . Error bars represent s.e.m.  
175

### 176 **Olfaction of social and non-social odors in KO mice is normal**

177 Olfaction is the major sensory modality that drives social behaviors in rodents (Arakawa et al.,  
178 2008). Since BDNF KO male mice have normal social recognition (Ito et al., 2011), it is less  
179 likely that an impaired recognition of familiarity prevented KO mice from changing the  
180 contacting and eating activities. Nevertheless, we tested for a potential olfactory deficit in KO  
181 mice using the olfactory habituation/dishabituation test (Crawley et al., 2007) with two non-  
182 social and two social odors (Fig.4). Odor habituation was defined as a decline of sniffing

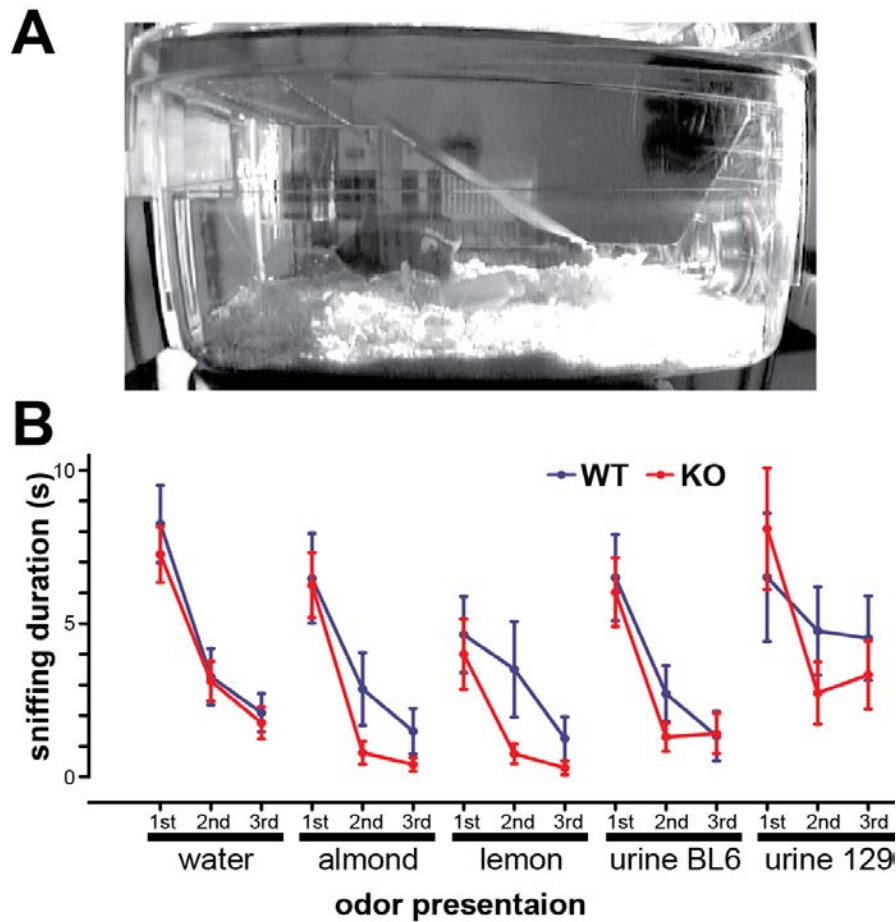

183  
184

185 Fig.4 Olfactory habituation/dishabituation test. A) An example of an animal sniffing an odor  
186 presentation tray with a novel odor. B) Summary diagram for the sniffing duration in WT (blue)  
187 and KO (red) mice. The X-axis shows the sequence of odors' presentations. n= 20 WT and 23  
188 KO mice. Error bars represent s.e.m.

189

190 duration along three consecutive presentations of an identical odor. It was significant in both  
191 genotypes with all odors (WT,  $F(2,19) > 6.0$ ,  $p < 0.005$ ; KO,  $F(2,22) > 8.9$ ,  $p < 0.001$ ) except for the  
192 WT mice with the odors of lemon ( $F(2,19) = 3.0$ ,  $p = 0.064$ ) and urine from 129SvEv males  
193 ( $F(2,19) = 0.5$ ,  $p = 0.61$ ). Odor dishabituation was defined as an increase in sniffing duration upon

194 presentation of a new odor. The dishabituation was significant in both genotypes with all odors  
195 (WT,  $F(2,19) > 8.6$ ,  $p < 0.009$ ; KO,  $F(2,22) > 9.3$ ,  $p < 0.006$ ), except for the WT mice presented with  
196 the lemon odor ( $F(2,19) = 4.2$ ,  $p = 0.056$ ). There was no odor\*genotype interaction in the  
197 habituation/dishabituation tests. These findings indicate that KO mice have normal olfaction.

198

### 199 **Blunted pain sensitization in BDNF KO mice**

200 Although BDNF KOs distinguish odors including urine smells from conspecifics of different  
201 genetic backgrounds, the failures to sustain contacts with anesthetized cage mate and to decrease  
202 eating may result from an inability to perceive the state of others or a deficit in empathy-like  
203 behaviors. Given the overlap between neuronal pathways implicated in such perception and the  
204 pathways involved in pain sensitization (Engen and Singer, 2013; Li et al., 2014), the responses  
205 to persistent pain were examined using the formalin test.

206       Upon formalin injection, WT mice exhibited typical biphasic nociceptive response  
207 (Bannon and Malmberg, 2007) (Fig.5), with intense paw licking during the first five minutes  
208 after formalin injection, followed by a decline and then by the second phase with the licking  
209 peak at 15-25 min after the injection. The KO mice exhibited same levels of licking with the WT  
210 mice during the first five minutes (phase 1) but significantly less licking during the 15-25 min  
211 time interval (phase 2) ( $p < 0.01$ , t-test), which suggests that KO mice have normal response to  
212 acute pain but are impaired in sensitization to the persistent pain.

213

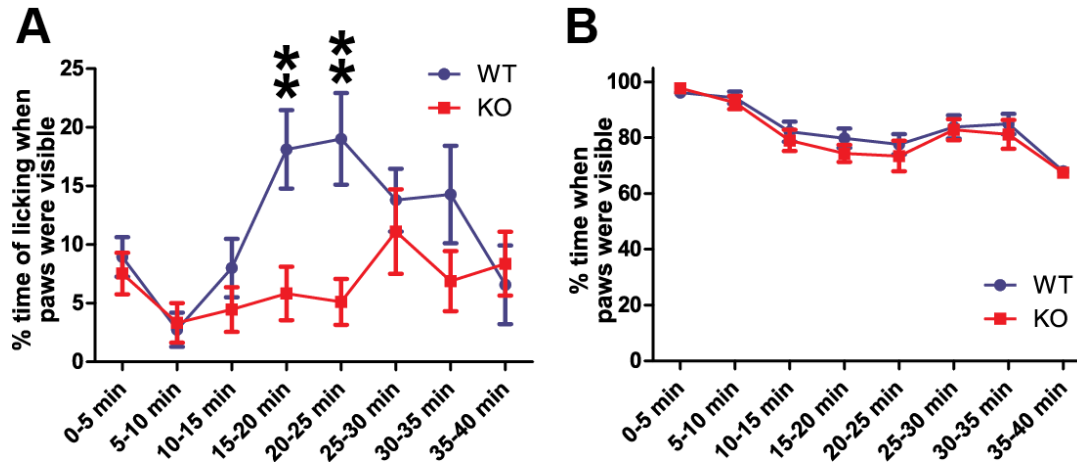

214

215 Fig.5 Blunted pain sensitization in KO mice. A) Summary diagram for paw licking time  
216 expressed as the percentage of the total time when animal paws were clearly visible during 5 min  
217 bins along the 40 min after formalin injection. B) Percentages of time when animals' paws were  
218 clearly visible. Blue and red represent WT (n=18) and KO (n=15) subjects. Unpaired t-test: \*\*p  
219 < 0.01. Error bars represent s.e.m.

220

221

## 222 Discussion

223 Here, we report a novel social trait in mice - the preference towards making repeated social  
224 contacts with a familiar over unfamiliar anesthetized conspecific in the home cage environment.  
225 Then, we find this trait compromised in mice with the CA3-restricted knockout of BDNF, whose  
226 high aggression against an awake conspecific (Ito et al., 2011) masks more subtle social  
227 behaviors.

228 There are two advantages of using anesthetized demonstrator for investigating social  
229 behaviors. First, the subject activity is not affected by the behavior of demonstrator. In contrast,  
230 with awakened demonstrator, social contacts are initiated and terminated not only by subject but  
231 also by a demonstrator, which makes it difficult to attribute the pattern and amount of social

232 interaction solely to the properties of the subject. This problem is partially solved by restricting  
233 movement of the demonstrator to a wire cup (Moy et al., 2004), which makes it possible to  
234 isolate active social touches made by the subjects but does not entirely exclude influences from  
235 the demonstrator. Second, the anesthetized demonstrator is less likely to induce aggression,  
236 which requires a chain of reciprocal activities (Ito et al., 2011) and potentially masks other social  
237 behaviors. Conversely, the limitation of the test is the omission of social behaviors driven by  
238 reciprocal interactions.

239         In this study, all subjects did not express aggression but actively contacted demonstrator  
240 regardless whether it was familiar or not. During the first ten minutes of the test, when there was  
241 a burst of contacting activity, the familiarity of demonstrator did not affect the duration of  
242 contacts. However, during the following 80 minutes, when the overall level of contacts decreased,  
243 animals spent more time contacting the familiar demonstrator. It suggests that while the initial  
244 highly intense contacts are driven by exploration and novelty seeking, the subsequent contacts  
245 are driven more by the social cues that are already familiar to the subject and that those familiar  
246 cues enable the sustained contacting activity (Fig.1). The sustained contacts with familiar  
247 animals did not involve huddling. However, when demonstrator woke up and began to move, the  
248 huddling returned, which indicates that huddling requires social signals from an awakened  
249 animal. The lack of a significant effect of genotype on the initial contacts suggests that the  
250 exploratory drive and novelty seeking are not compromised by the CA3 BDNF deletion. The  
251 normal response to novelty was also supported by the normal olfactory dishabituation upon  
252 presentation of novel odors (Fig.4). By contrast, the significantly decreased duration of the later  
253 contacts suggests a deficit in processing the familiar social cues.

254           How the familiar social cues cause sustained and relatively high contacting activity?  
255 Novelty seeking, sexual drive or aggression against a competing animal does not explain the  
256 contacts. One explanation could be the drive to affiliate with a familiar conspecific (Panksepp et  
257 al., 2007), but it appears contradicting the natural preference of mice for social novelty (Moy et  
258 al., 2004). An alternative but intriguing idea is that the irregular state of the anesthetized familiar  
259 conspecific is the cause. The anesthetized cage mate generates social cues recognized as familiar  
260 by the subject but does not express predicted behaviors, even upon social contacts. The conflict  
261 between predicted and observed behaviors could trigger the elevated contacting activity and  
262 possibly suppress feeding. Ethologically relevant situations could be the encounters with a sick,  
263 injured or distressed conspecific. The stronger response to the lack of expected behaviors from a  
264 familiar versus an unfamiliar animal may indicate a higher sensitivity to the state of the partner  
265 than of a stranger and be, therefore, categorized as one of the empathy-like traits, for some of  
266 which the familiarity is the major determinant (Jeon et al., 2010; Langford et al., 2006).

267           Then, what is wrong in BDNF KO mice? Their decreased preference to contacting  
268 familiar demonstrator could not be explained by changes in sociability, which was found normal.  
269 Neither it could be explained by a failure to recognize a cage mate because these mice have  
270 normal social recognition (Ito et al., 2011) and the ability to recognize social and non-social  
271 odors (Fig.4). A possible blunted sensitivity to the state of the partner, however, could explain  
272 not only the reduced contacting time with the anesthetized familiar demonstrator but also the  
273 inability to reduce aggression against a cage mate even when it shows submission (Ito et al.,  
274 2011). In addition, the atypical response of KO mice in the formalin test suggests a malfunction  
275 of the neuronal mechanisms underlying sensitization to persistent pain, possibly in the anterior  
276 cingulate cortex (Zhuo, 2007), which has been implicated in empathy in humans and empathy-

277 like behaviors in rodents (Engen and Singer, 2013; Jeon et al., 2010; Li et al., 2014). While the  
278 link between the hippocampal CA3-restricted BDNF knockout and neuronal mechanisms of  
279 empathy-like behaviors has not been established, the evidence that normal late development of  
280 the prefrontal cortex requires the hippocampus (Bertolino et al., 2002; O'Donnell et al., 2002),  
281 points to a possibility that the loss of hippocampal BDNF is causing a relevant malfunction in the  
282 prefrontal cortex.

283

## 284 **Materials and Methods**

### 285 **Animals**

286 Mice with the CA3-restricted knockout of BDNF were generated by combining two mutant  
287 mouse lines, the floxed BDNF line (Zakharenko et al., 2003) and the transgenic bacterial  
288 artificial chromosome KA1 Cre recombinase driver line (Nakazawa et al., 2002) as previously  
289 described (Ito et al., 2011). Prior to interline crossings, these lines were backcrossed to C57BL/6  
290 background animals a minimum of 6 generations. To produce animals for experiments,  
291 homozygous BDNF-floxed Cre-positive ( $BDNF^{ff, Cre}$ ) males were crossed with homozygous  
292 BDNF-floxed Cre-negative ( $BDNF^{ff}$ ) females to obtain  $BDNF^{ff, Cre}$  and  $BDNF^{ff}$  male animals,  
293 further referred to as knockout (KO) and wild type (WT), respectively. The genotype of mice  
294 was determined as previously described (Zakharenko et al., 2003).

### 295 **Behavior**

296 All experiments were approved by Virginia Tech IACUC and followed the NIH Guide for the  
297 Care and Use of Laboratory Animals. Male mice were weaned around p21-p25 when body  
298 weight exceeded 10 g and housed as pairs of littermates of the same genotype in a regular 12:12  
299 h dark-light cycle. Bedding was hardwood chips (Beta Chip, NEPCO, Warrensburg, NY). A TP



300 roll (1.5"×4.5", Jonesville Paper Tube Corp, Jonesville, MI), a 2"×2" Nestlet, and a pinch of  
301 Enviro-Dri (PharmaServ, Framingham, MA) served as environmental enrichment. Food (Rodent  
302 NIH-07 open formula diet, Envigo, Cambridgeshire, UK) and water were provided ad libitum.  
303 Experiments were performed at p40–p60, prior to the onset of aggression toward cage mate (Ito  
304 et al., 2011). Behavioral experiments were done during the light phase of the light-dark cycle  
305 under the illumination of 200 lux except for the interaction with anesthetized conspecific. The  
306 days of weekly cage changes were avoided.

307 *Interaction with anesthetized conspecific.* The experiments were performed using the home  
308 cages that housed subject mice for no less than two days after cage change. A cage mate or an  
309 age-matched 129SvEv male mouse (a demonstrator mouse) was anesthetized with intramuscular  
310 injection of ketamine/xylazine/acepromazine (100/20/3 mg/kg) and placed at the center of the  
311 cage. When a 129 mouse served as a demonstrator, the cage mate was removed prior to  
312 introducing demonstrator. The behavior of the subject was recorded digitally at 5-8 frames per  
313 second (fps) using the StreamPix5 software (Quebec, Canada) in a dark room under infrared  
314 LED illumination. The sessions started at the beginning of the dark cycle (7 pm) and lasted for  
315 90 min. Beginning and end of each epoch of body contact (defined in the results) between  
316 subject and demonstrators were determined offline by experimenters blind to the animal  
317 genotype using a custom-made behavior annotation module for the StreamPix5 software, which  
318 allows annotations for predefined behaviors at the resolution of a single video frame. In addition,  
319 the durations of eating, drinking, hanging from the wire lid, sitting still inside the cotton nest,  
320 digging bedding, self-grooming, not moving outside the nest and the counts of rearing were  
321 determined using the same method. To quantify locomotion inside the home cages, the

322 trajectories of animal movements were tracked manually using a custom-made tracking module  
323 for StreamPix5 software and a pen tablet connected to a PC.

324 The sociability test. The sociability test was performed as described (Moy et al., 2004). The  
325 sociability chamber (60 x 40 cm, ANY-maze, Wood Dale, IL) made with transparent Plexiglas  
326 sheet consisted of three compartments (20 x 40 cm) connected by two gates (width x height: 5 x  
327 8 cm) with sliding doors. Two small, round wire cups (black, diameter x height: 10.5 x 11 cm,  
328 Galaxy Pencil & Utility Cup, Spectrum, Streetsboro, OH) were placed at the centers of both side  
329 compartments. Plastic cups (SOLO® Plastic Cold Party Cups, Red, 16 oz) filled with water were  
330 placed on the top of the wire cups to prevent the subject from climbing the wire cups. The  
331 behavior of the subject was recorded using the Streampix5 software and 3 digital video cameras,  
332 viewing from the top and from each side of the chamber to avoid any blind spots. The  
333 experimenter hid behind a curtain. The subject was first acclimated in the center compartment  
334 with doors closed for 5 min. Then, a demonstrator mouse was introduced into one of the cups  
335 selected randomly and the doors were opened. The subject was allowed to explore the  
336 compartments for 10 min. Cage mates and age-matched 129SvEv mice were used as familiar and  
337 unfamiliar demonstrators, respectively, and were acclimated within 1-2 days before the test by  
338 being placed inside the wire cup for 30 min. The beginning and end of the behavior epochs when  
339 subjects were attending towards the cups or were physically touching them were annotated the  
340 same way as the interaction with anesthetized conspecifics.

341 Olfaction test. The olfactory habituation/dishabituation test was performed as described (Yang  
342 and Crawley, 2009) with slight modifications. Weighing boats (4.5 x 4.5 cm) with a piece of  
343 Whatman paper (2 x 2 cm) attached by Scotch double sided adhesive tape were used for odor  
344 presentation. On day 1, subject animals were acclimated for 1 hour to the test environment,

345 which was a clean cage with a metal lid, a cover top and a clean odor presentation boat placed on  
346 fresh wood bedding. The cage was located on a rack equipped with monitoring cameras. On day  
347 2, after 30 min acclimation, sequential presentation of odors was performed repeatedly 3 times  
348 for each odor, using freshly prepared odor presentation boats spotted with 10  $\mu$ L of water,  
349 imitation almond (1:20 dilution, Kroger), lemon extract (1:20 dilution, Por Han-Dee Pak, Inc),  
350 urine from C57BL6 males and urine from 129SvEv males. One presentation consisted of 2 min  
351 placement of the boat at the center of the cage. The interval between presentations was around 1  
352 min. The animal behaviors were recorded using digital video cameras and StreamPix5, while the  
353 experimenter hid behind a curtain. Although the room illumination was set at 200 lux, an IR  
354 LED illumination was applied from the side of cages for optimal video recording. The analysis  
355 was performed offline by persons unaware of the subject genotype. The beginning and the end of  
356 the subject sniffing the boat were recorded. The subjects that buried the boat by digging around it  
357 were excluded from the analysis.

358 Formalin test. The test was performed as described (Bannon and Malmberg, 2007; Dubuisson  
359 and Dennis, 1977) in transparent plastic cylinders (diameter x height: 13 x 15 cm) positioned  
360 within compartments to prevent animals in neighboring cylinders from seeing one another while  
361 allowing videotaping from the front. Two mirrors were assembled at the angle of 90 degrees and  
362 placed at the back of each cylinder to maximize the visibility of the subject. The experimenter  
363 hid behind a curtain. On day 1, each subject was acclimated to the cylinder for 30 min. On day 2,  
364 mice received subcutaneous 20  $\mu$ L injections of 5% formalin in the middle of the hind paw on  
365 the plantar side using a 50  $\mu$ L Hamilton syringe with a 30G needle. The animals were placed in  
366 the cylinder and videotaped for 40 min using the StreamPix5 software. The recordings were  
367 analyzed offline using the annotation module for StreamPix5 by experimenters blind to the

368 animal genotype. The duration of epochs when animal licked the hind paw and when the hind  
369 paws were invisible by the camera was determined.

### 370 **Statistics and data analysis**

371 Two-way ANOVA and the Bonferroni post-hoc test were used to analyze interaction with the  
372 anesthetized demonstrator, non-social behaviors, and sociability in the three-chamber experiment.  
373 The factors were genotype, demonstrator (familiar or not) and cup (empty vs with demonstrator).  
374 The Student t-test was used to compare contact times with familiar and unfamiliar anesthetized  
375 demonstrator during the 10 min time bins and to compare licking times in the formalin test. Two-  
376 way repeated measure ANOVA was used in the olfactory habituation/dishabituation test with  
377 odor and genotype as the factors. The correlation between contacting and eating was tested using  
378 the Pearson correlation coefficient. Effects were considered significant at  $p < 0.05$ .

379

### 380 **Acknowledgements**

381 The study was supported by NIH grant K22MH097826.

382

### 383 **Competing interests**

384 Authors declare no competing interests.

## 385 **References**

- 386 Arakawa, H., Blanchard, D.C., Arakawa, K., Dunlap, C., and Blanchard, R.J. (2008). Scent marking behavior  
387 as an odorant communication in mice. *Neuroscience and biobehavioral reviews* 32, 1236-1248.
- 388 Bannon, A.W., and Malmberg, A.B. (2007). Models of nociception: hot-plate, tail-flick, and formalin tests  
389 in rodents. *Current protocols in neuroscience / editorial board, Jacqueline N Crawley [et al] Chapter 8,*  
390 *Unit 8 9.*
- 391 Ben-Ami Bartal, I., Decety, J., and Mason, P. (2011). Empathy and pro-social behavior in rats. *Science*  
392 334, 1427-1430.
- 393 Bertolino, A., Roffman, J.L., Lipska, B.K., van Gelderen, P., Olson, A., and Weinberger, D.R. (2002).  
394 Reduced N-acetylaspartate in prefrontal cortex of adult rats with neonatal hippocampal damage.  
395 *Cerebral cortex* 12, 983-990.
- 396 Blanchard, R.J., Flannelly, K.J., and Blanchard, D.C. (1986). Defensive behavior of laboratory and wild  
397 *Rattus norvegicus*. *J Comp Psychol* 100, 101-107.
- 398 Blanchard, R.J., Yudko, E.B., Blanchard, D.C., and Taukulis, H.K. (1993). High-frequency (35-70 kHz)  
399 ultrasonic vocalizations in rats confronted with anesthetized conspecifics: effects of gepirone, ethanol,  
400 and diazepam. *Pharmacology, biochemistry, and behavior* 44, 313-319.
- 401 Chen, Q., Panksepp, J.B., and Lahvis, G.P. (2009). Empathy is moderated by genetic background in mice.  
402 *PloS one* 4, e4387.
- 403 Crawley, J.N., Chen, T., Puri, A., Washburn, R., Sullivan, T.L., Hill, J.M., Young, N.B., Nadler, J.J., Moy, S.S.,  
404 Young, L.J., *et al.* (2007). Social approach behaviors in oxytocin knockout mice: comparison of two  
405 independent lines tested in different laboratory environments. *Neuropeptides* 41, 145-163.
- 406 Dubuisson, D., and Dennis, S.G. (1977). The formalin test: a quantitative study of the analgesic effects of  
407 morphine, meperidine, and brain stem stimulation in rats and cats. *Pain* 4, 161-174.
- 408 Engen, H.G., and Singer, T. (2013). Empathy circuits. *Current opinion in neurobiology* 23, 275-282.
- 409 Ferguson, J.N., Young, L.J., Hearn, E.F., Matzuk, M.M., Insel, T.R., and Winslow, J.T. (2000). Social  
410 amnesia in mice lacking the oxytocin gene. *Nat Genet* 25, 284-288.
- 411 Galef, B.G., and Wigmore, S.W. (1983). Transfer of Information Concerning Distant Foods - a Laboratory  
412 Investigation of the Information-Center Hypothesis. *Anim Behav* 31, 748-758.
- 413 Ito, W., Chehab, M., Thakur, S., Li, J., and Morozov, A. (2011). BDNF-restricted knockout mice as an  
414 animal model for aggression. *Genes, brain, and behavior* 10, 365-374.
- 415 Jeon, D., Kim, S., Chetana, M., Jo, D., Ruley, H.E., Lin, S.Y., Rabah, D., Kinet, J.P., and Shin, H.S. (2010).  
416 Observational fear learning involves affective pain system and Cav1.2 Ca<sup>2+</sup> channels in ACC. *Nat*  
417 *Neurosci* 13, 482-488.
- 418 Langford, D.J., Crager, S.E., Shehzad, Z., Smith, S.B., Sotocinal, S.G., Levenstadt, J.S., Chanda, M.L.,  
419 Levitin, D.J., and Mogil, J.S. (2006). Social modulation of pain as evidence for empathy in mice. *Science*  
420 312, 1967-1970.
- 421 Li, Z., Lu, Y.F., Li, C.L., Wang, Y., Sun, W., He, T., Chen, X.F., Wang, X.L., and Chen, J. (2014). Social  
422 interaction with a cagemate in pain facilitates subsequent spinal nociception via activation of the medial  
423 prefrontal cortex in rats. *Pain* 155, 1253-1261.
- 424 Moy, S.S., Nadler, J.J., Perez, A., Barbaro, R.P., Johns, J.M., Magnuson, T.R., Piven, J., and Crawley, J.N.  
425 (2004). Sociability and preference for social novelty in five inbred strains: an approach to assess autistic-  
426 like behavior in mice. *Genes, brain, and behavior* 3, 287-302.
- 427 Nakazawa, K., Quirk, M.C., Chitwood, R.A., Watanabe, M., Yeckel, M.F., Sun, L.D., Kato, A., Carr, C.A.,  
428 Johnston, D., Wilson, M.A., *et al.* (2002). Requirement for hippocampal CA3 NMDA receptors in  
429 associative memory recall. *Science* 297, 211-218.
- 430 O'Donnell, P., Lewis, B.L., Weinberger, D.R., and Lipska, B.K. (2002). Neonatal hippocampal damage  
431 alters electrophysiological properties of prefrontal cortical neurons in adult rats. *Cerebral cortex* 12,  
432 975-982.

433 Panksepp, J.B., Jochman, K.A., Kim, J.U., Koy, J.J., Wilson, E.D., Chen, Q., Wilson, C.R., and Lahvis, G.P.  
434 (2007). Affiliative behavior, ultrasonic communication and social reward are influenced by genetic  
435 variation in adolescent mice. *PloS one* 2, e351.  
436 Panksepp, J.B., and Lahvis, G.P. (2011). Rodent empathy and affective neuroscience. *Neuroscience and*  
437 *biobehavioral reviews* 35, 1864-1875.  
438 Sa-Rocha, V.M., Sa-Rocha, L.C., and Palermo-Neto, J. (2006). Variations in behavior, innate immunity and  
439 host resistance to B16F10 melanoma growth in mice that present social stable hierarchical ranks.  
440 *Physiology & behavior* 88, 108-115.  
441 Winslow, J.T., and Miczek, K.A. (1983). Habituation of aggression in mice: pharmacological evidence of  
442 catecholaminergic and serotonergic mediation. *Psychopharmacology* 81, 286-291.  
443 Yang, M., and Crawley, J.N. (2009). Simple behavioral assessment of mouse olfaction. *Current protocols*  
444 *in neuroscience / editorial board, Jacqueline N Crawley [et al] Chapter 8, Unit 8 24.*  
445 Zakharenko, S.S., Patterson, S.L., Dragatsis, I., Zeitlin, S.O., Siegelbaum, S.A., Kandel, E.R., and Morozov,  
446 A. (2003). Presynaptic BDNF required for a presynaptic but not postsynaptic component of LTP at  
447 hippocampal CA1-CA3 synapses. *Neuron* 39, 975-990.  
448 Zhuo, M. (2007). A synaptic model for pain: long-term potentiation in the anterior cingulate cortex. *Mol*  
449 *Cells* 23, 259-271.

450 1.
